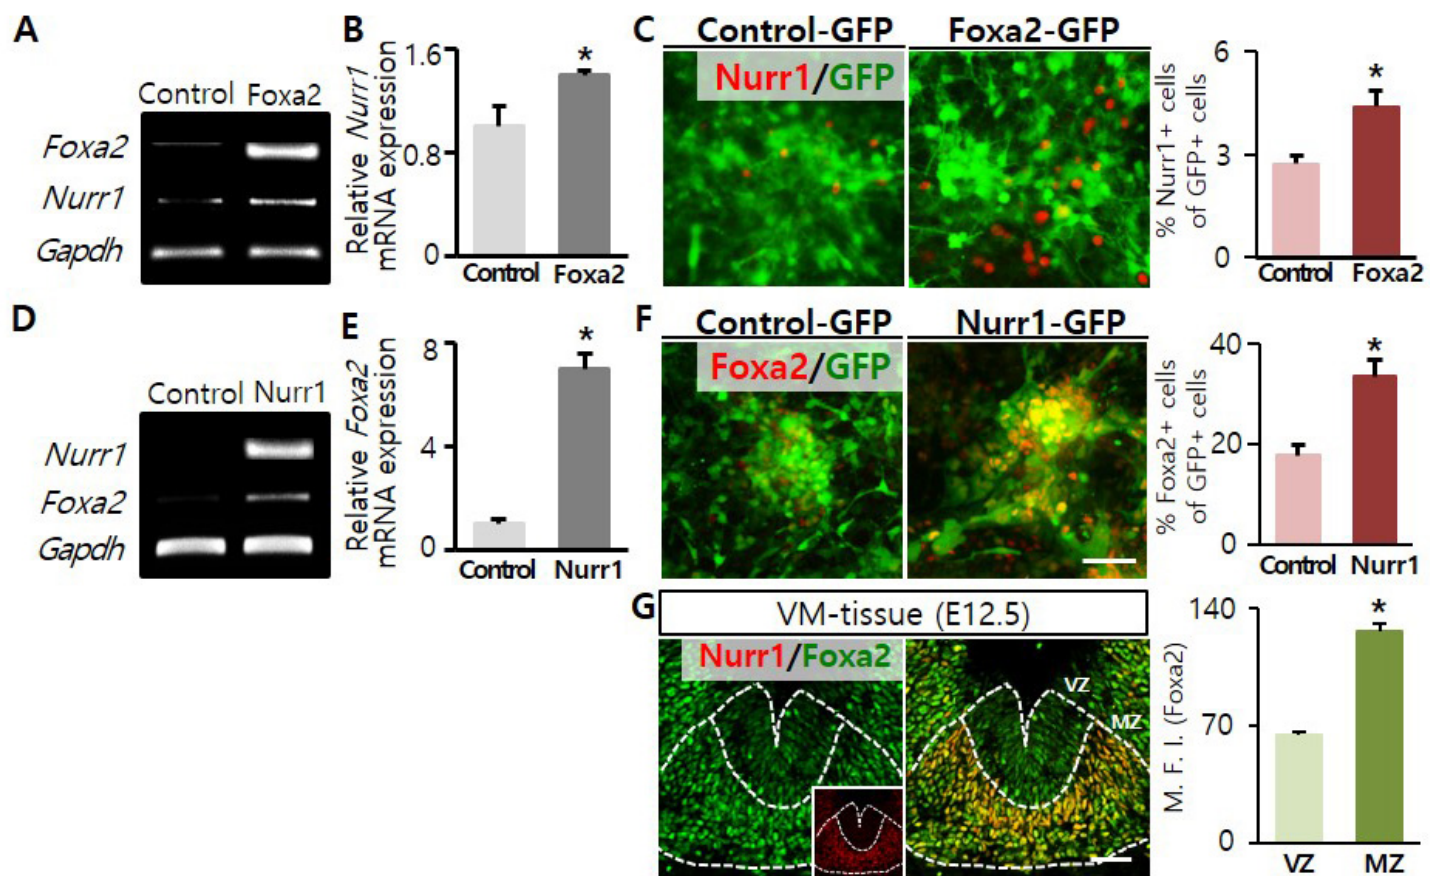

**Suppl. Fig. S1. Gain-of-function analyses *in vitro* to confirm positive cross-regulatory loop between Nurr1 and Foxa2 expression.** NPCs derived from VM at E11 were subcultured to examine gain-of-function effects. (A-F) The passaged VM-NPC cultures yielded fewer Nurr1<sup>+</sup> and Foxa2<sup>+</sup> cells upon differentiation than unpassaged cultures. The passaged cultures were transduced with virus expressing Foxa2-IRES-GFP (A-C) or Nurr1-IRES-GFP (D-F) and differentiated for 6 days. Control cultures were transduced with virus expressing IRES-GFP. Semi-quantitative PCR (A,D), real-time PCR (B,E), and immunocytochemistry (C,F) analyses were carried out for Nurr1 and Foxa2 expression. (C,F) are representative images for Nurr1<sup>+</sup>/GFP<sup>+</sup> and Foxa2<sup>+</sup>/GFP<sup>+</sup> cells, respectively. Graphs on the right depict percentages of the co-expressing cells out of total GFP<sup>+</sup> cells in 20-40 clusters randomly selected from 3 independent culture sets. \*Significantly different from control at  $P < 0.05$  (B),  $P < 0.005$  (C), and  $P < 0.001$  (E,F). (G) Comparison of Foxa2 expression levels in the Nurr1-negative ventricular zone (VZ) and Nurr1-positive mantle zone (MZ) of the embryonic mouse VM. VM tissue sections of mouse embryos at E12 were stained with anti-Foxa2 antibody (Inset, identical section Nurr1-stained). Foxa2-stained cells were randomly selected from the VZ and MZ (40 cells each) and Foxa2 expression levels were quantified as mean fluorescence intensities (MFI) of individual anti-Foxa2-stained cells. \* $P < 0.001$ , Student's *t*-test. Scale bar, 50  $\mu$ m.

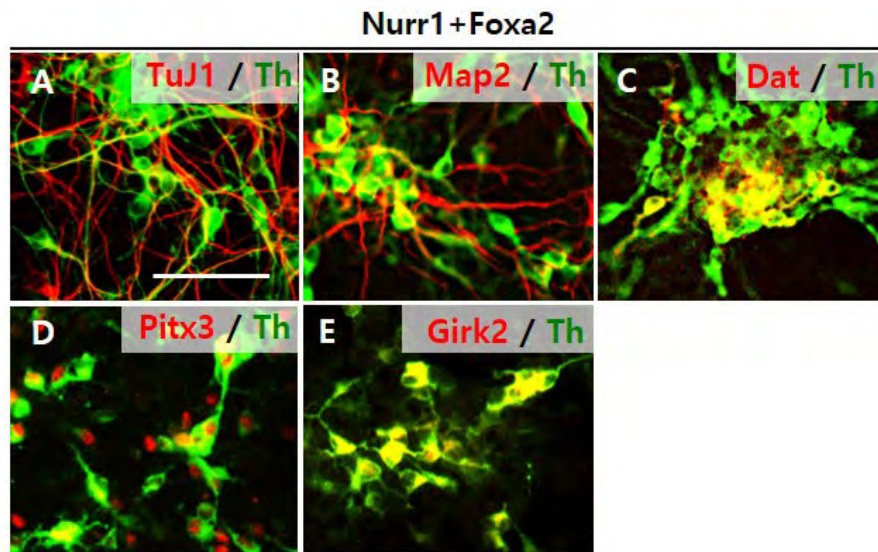

**Suppl. Fig. S2. Midbrain-type DA neuronal phenotypes of TH<sup>+</sup> cells induced by exogenous Nurr1 and Foxa2 co-expression.** Non-dopaminergic cortical NPCs were transduced with Nurr1<sup>+</sup> Foxa2, and differentiated for 6 days. Immunofluorescence staining was conducted using the indicated antibodies. Scale bar, 50µm.

|                       |                                                                                     |                                                                                      |                                                                                       |
|-----------------------|-------------------------------------------------------------------------------------|--------------------------------------------------------------------------------------|---------------------------------------------------------------------------------------|
|                       | 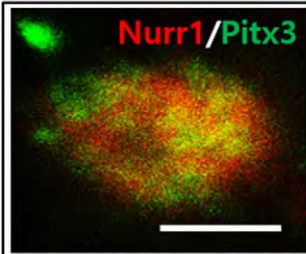 |  |  |
| Pearson's Correlation | 0.705±0.045                                                                         | 0.122±0.037                                                                          | 0.325±0.132                                                                           |
| Overlap Coefficient   | 0.799±0.073                                                                         | 0.46±0.038                                                                           | 0.565±0.038                                                                           |

**Suppl. Fig. S3. Analysis of Nurr1 colocalization with Pitx3, NeuN, and HuC/D by Pearson's correlation and overlap coefficient values.** Shown are representative images of single nucleus co-stained with Nurr1/Pitx3, Nurr1/NeuN, and Nurr1/HuC/D from the VM tissue sections at E12. Scale bar, 5µm.

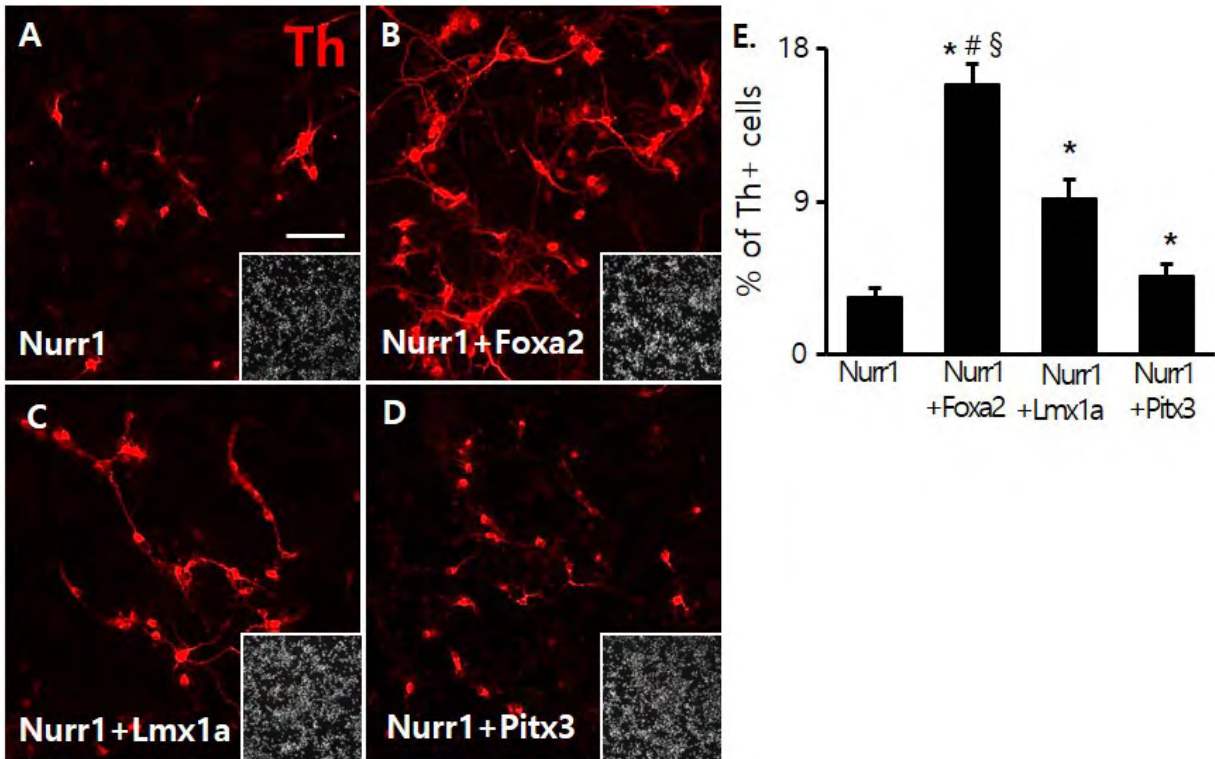

**Suppl. Fig. S4. Comparison of the activities of Nurr1 coactivators reported.** NPCs derived from mouse embryonic cortices at E12 were co-transduced with the retroviruses containing the control empty vector (A), Foxa2 (B), Lmx1a (C), or Pitx3 (D) along with Nurr1. The coactivator virus titers were carefully adjusted to  $1 \times 10^{11}$  virus particles/ml. Graph E represents the percentage of DAPI<sup>+</sup> cells that were TH<sup>+</sup>. Significance from the control\*, Nurr1+Lmx1a# and Nurr1+Pitx3§ at  $P < 0.001$ , Scale bar, 50 $\mu$ m.

Suppl. Table. S1. mRNA expressions of 21 genes selected from microarray data

**A**

| SYMBOL          | DEFINITION                                                           | Accession No. | Fold Increase |            |             |             |
|-----------------|----------------------------------------------------------------------|---------------|---------------|------------|-------------|-------------|
|                 |                                                                      |               | N/C           | F/C        | NF/C        | NF/N        |
| <u>Th</u>       | Tyrosine hydroxylase                                                 | NM_009377     | 1.71±0.02     | 1.52±0.43  | 38.47±1.18  | 22.513±0.41 |
| <u>Slc6a3</u>   | Dopamine transporter, <i>Dat</i>                                     | NM_010020     | 1.23±0.14     | -0.03±1.12 | 12.2±2.81   | 9.77±1.2    |
| <u>Lrrk2</u>    | Leucine-rich repeat kinase 2                                         | NM_025730     | 1.96±0.6      | 1.22±0.02  | 12.01±3.63  | 6.13±0.01   |
| <u>Ddc</u>      | Dopa Decarboxylase, Aromatic L-amino acid decarboxylase, <i>Aadc</i> | NM_016672     | 1.66±0.59     | 26.96±4.83 | 39.15±6.34  | 14.3±1.41   |
| <u>Sod3</u>     | Superoxide dismutase3                                                | NM_011435     | 1.96±0.22     | 0.04±1.12  | 23.36±7.23  | 11.67±2.37  |
| <u>Calca</u>    | Calcitonin/calcitonin-related polypeptide, alpha                     | NM_007587     | 1.86±0.29     | 4.71±3.3   | 28.61±14.5  | 17.04±10.49 |
| <u>Lpl</u>      | Lipoprotein lipase                                                   | NM_008509     | 27.16±1.77    | 6.41±4.7   | 53.7±6.31   | 2.0±0.36    |
| <u>Ednra</u>    | Endothelin receptor type A                                           | NM_010332     | 1.59±0.45     | 9.2±3.7    | 24.5±9.72   | 14.88±1.85  |
| <u>Ndg2</u>     | Nur77 downstream gene 2                                              | NM_175329     | 3.11±0.98     | 2.58±0.96  | 16.42±8.79  | 4.88±1.28   |
| <u>Car14</u>    | Carbonic anhydrase 14                                                | NM_011797     | -1.9±0.53     | 3.09±1.69  | 17.18±6.5   | 24.35±8.42  |
| <u>Dnajc6</u>   | DnaJ (Hsp40) homolog, subfamily C, member 6                          | NM_198412     | 4.23±2.53     | 2.12±0.35  | 18.85±2.55  | 6.31±3.18   |
| <u>Aard</u>     | Alanine and arginine rich domain containing protein                  | NM_175503     | 1.3±0.06      | 5.86±2.21  | 14.85±3.25  | 11.34±1.91  |
| <u>Klf5</u>     | Kruppel-like factor 5                                                | NM_009769     | 6.66±4.48     | 2.2±0.83   | 17.67±0.17  | 4.8±3.26    |
| <u>Ctsh</u>     | Cathepsin H                                                          | NM_007801     | 0.16±1.34     | 1.3±0.24   | 12.67±4.31  | 12.76±7.19  |
| <u>Arhgap29</u> | Rho GTPase activating protein 29                                     | NM_172525     | 3.26±1.39     | 2.96±0.52  | 13.73±1.93  | 4.85±1.49   |
| <u>Rfrp</u>     | Neuropeptide VF precursor                                            | NM_021892     | 1.39±0.36     | 3.15±2.05  | 14.23±0.09  | 11.0±2.95   |
| <u>Pkp2</u>     | Plakophilin 2                                                        | NM_026163     | 1.8±0.17      | 1.35±0.1   | 10.72±4.06  | 5.8±1.71    |
| <u>Cldn10</u>   | Claudin10                                                            | NM_021386     | -1.65±0.09    | -1.34±0.35 | 12.22±2.49  | 16.92±3.86  |
| <u>Palmd</u>    | Palmdelphin                                                          | NM_023245     | 1.31±0.24     | 3.26±0.43  | 26.49±12.01 | 19.19±5.65  |
| <u>Fgf10</u>    | Fibroblast growth factor 10                                          | NM_008002     | 1.33±0.04     | 1.12±0.06  | 10.13±3.74  | 7.7±3.04    |
| <u>Mia1</u>     | Melanoma inhibitory activity 1                                       | NM_019394     | 0.06±1.26     | 0.35±1.56  | 15.14±2.85  | 14.26±0.44  |

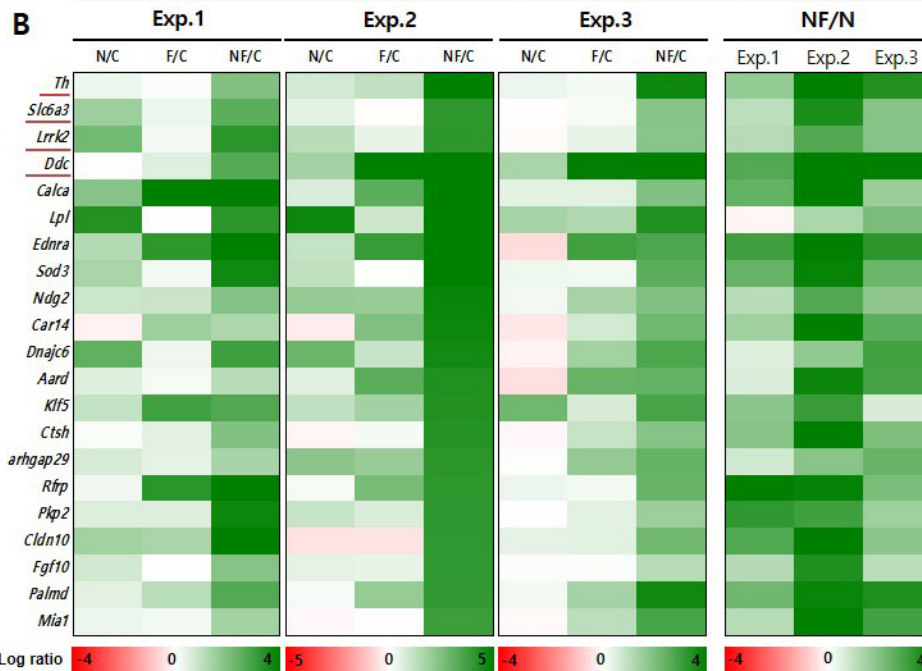

High through-put gene expression analyses were done on NPCs transduced with control (C), Nurr1 (N), Foxa2 (F), and Nurr1+Foxa2 (NF). To know co-activator role of Foxa2 in Nurr1-induced gene expression, the microarray data were analyzed for the gene expressions up-regulated (>2 folds) in NPCs expressing Nurr1+Foxa2, compared to those expressing Nurr1 alone. 21 genes fit this criterion and are listed with their expression ratios (A) and heatmaps of log<sub>2</sub> transformed expression ratios (B). n= 3 independent microarray analyses. Each microarray analysis was done in the control-, Nurr1-, Foxa2-, Nurr1+Foxa2-transduced cultures, and interested gene expressions in the Nurr1-, Foxa2, and Nurr1+Foxa2-expressing cultures were compared with those of the control culture. Genes associated with DA neuron phenotypes are underlined.

Suppl. Table. S2. PCR primers information used in this study

| Gene symbol                                   | Sequence                                                  | Product size | Cycles & Annealing temp. |
|-----------------------------------------------|-----------------------------------------------------------|--------------|--------------------------|
| <b>PCR primers for gene expression</b>        |                                                           |              |                          |
| <i>Tyrosine Hydroxylase (Th)</i>              | F : gccgtctcagagcaggatac<br>R : agcatttccatccctctct       | 196bp        | 30-32 cycles<br>60 °C    |
| <i>Dopamine transporter (Dat)</i>             | F : tggcttcggtgtcttctct<br>R : cagctggaactcatcgacaa       | 221bp        | 26-28 cycles<br>58 °C    |
| <i>Vesicle monoamine transporter2 (Vmat2)</i> | F : ctttgagattggttttgc<br>R : gcagttgtgtccatgag           | 300bp        | 26-28 cycles<br>58 °C    |
| <i>Engrailed1 (En1)</i>                       | F : tcaagactgactacagcaacccc<br>R : ctttgctcgaaccgtggtgtag | 200bp        | 26-28 cycles<br>58 °C    |
| <i>Gbx2</i>                                   | F : atgagcgcagcgttcccgccg<br>R : cggcgttgggcgcagcacca     | 200bp        | 26-28 cycles<br>58 °C    |
| <i>CoREST</i>                                 | F : cacttggtatggacgacacg<br>R : cagcccttaggcagaatgag      | 210bp        | 30-32 cycles<br>60 °C    |
| <i>Forkhead box protein2 (Foxa2)</i>          | F : gacataccgacgcagctaca<br>R : ggcaccttgagaaagcagtc      | 215bp        | 26-28 cycles<br>58 °C    |
| <i>Nurr1</i>                                  | F : cggtttcagaagtgcctagc<br>R : tgcctggaacctggaatag       | 194bp        | 26-28 cycles<br>58 °C    |
| <i>Gapdh</i>                                  | F : ctcatgaccacagtccatgc<br>R : ttcagctctgggatgacctt      | 154bp        | 25-28 cycles<br>60 °C    |
| <b>PCR primers for ChIP assay</b>             |                                                           |              |                          |
| <b>1. Primers for <i>Foxa2</i> promoter</b>   |                                                           |              |                          |
| <i>Foxa2</i> (Region1)                        | F : ctgcaggcagagaacacaga<br>R : ctttctggctaccacactca      | 248bp        | 40-45 cycles<br>58 °C    |
| <i>Foxa2</i> (Region2)                        | F : caagaccctcactcctcaaaa<br>R : cagaggcaggaggatctcag     | 193bp        | 40-45 cycles<br>58 °C    |
| <b>2. Primers for <i>Nurr1</i> promoter</b>   |                                                           |              |                          |
| <i>Nurr1</i> (Region1)                        | F : gcggtgggtcattgtttc<br>R : gcgctccggttcattgtc          | 199bp        | 40-45 cycles<br>58 °C    |
| <i>Nurr1</i> (Region2)                        | F : gggcacagtggcttaaaagt<br>R : ctctctgcaagttccaacc       | 181bp        | 40-45 cycles<br>58 °C    |
| <i>Nurr1</i> (Region3)                        | F : tgaataagacacgcgctcagg<br>R : agccccactgtcctttctt      | 212bp        | 40-45 cycles<br>58 °C    |
| <i>Nurr1</i> (Region4)                        | F : cagtgtcttagggccagag<br>R : gaagatcagctactctgctgga     | 221bp        | 40-45 cycles<br>58 °C    |

Suppl. Table. S3. Prediction of Nurr1 and Foxa2 binding sites on promoters of DA neuronal marker genes.

| TF                                    | Gene promoter (Kb from TSS)             | PWM setting                             |                      | Predicted binding sites |              |              |              |         |
|---------------------------------------|-----------------------------------------|-----------------------------------------|----------------------|-------------------------|--------------|--------------|--------------|---------|
|                                       |                                         |                                         |                      | Mouse                   |              | Rat          |              |         |
|                                       |                                         |                                         |                      | Sequence                | Location     | Sequence     | Location     |         |
| Nurr1                                 | <i>Foxa2</i><br>(M:-1085)<br>(R: -1069) | Conservation cutoffs                    | 94%                  | AAGCTCAC                | 420~427      | AAGCTCAA     | 428~435      |         |
|                                       |                                         | Window size                             | 50                   | GTAACCTT                | 1041~1048    | GTAACCTT     | 1025~1032    |         |
|                                       |                                         | Score threshold                         | 80%                  |                         |              |              |              |         |
|                                       | <i>Th</i><br>(M:-2505)<br>(R: -2461)    | Conservation Cutoffs                    | 70%                  | AAGGTAA                 | 356-363      | AAGGTAA      | 336~343      |         |
|                                       |                                         |                                         |                      | GAGGACAC                | 1399~1406    | GAGGACAC     | 1346~1353    |         |
|                                       |                                         | Window size                             | 50                   | AAGGTCCC                | 1511~1518    | AAGGTCCC     | 1454~1461    |         |
|                                       |                                         |                                         |                      | GAGGTCAG                | 1788~1795    | GAGGTCAG     | 1747~1754    |         |
|                                       | Score threshold                         | 80%                                     | CTGGCCTT             | 2437~2444               | CTGGCCTT     | 2392~2399    |              |         |
|                                       | <i>Dat</i><br>(M:-2775)<br>(R: -2556)   | Conservation Cutoffs                    | 70%                  | CTGACCTA                | 560~567      | TTGACCTA     | 246~253      |         |
|                                       |                                         |                                         |                      | GTGACCAT                | 2045~2052    | GTGACCAT     | 1820~1827    |         |
|                                       |                                         | Window size                             | 50                   | GAGACCTG                | 2184~2191    | GTGACCTG     | 1955~1962    |         |
|                                       |                                         |                                         |                      | GTGGCCTC                | 2643~2650    | GTGGCCTC     | 2423~2430    |         |
|                                       | Score threshold                         | 75%                                     |                      |                         |              |              |              |         |
|                                       | Foxa2                                   | <i>Nurr1</i><br>(M:-1091)<br>(R: -1010) | Conservation Cutoffs | 46%                     | AATGCAAATGA  | 212~223      | ATACCAAAGAGC | 129~140 |
|                                       |                                         |                                         |                      |                         | GACTGATAATTG | 238~249      | GAATGTGCAGGG | 151~162 |
| Window size                           |                                         |                                         | 50                   | AAATATTTACCT            | 370~381      | CCCCGTTTCCCT | 200~211      |         |
|                                       |                                         |                                         |                      | AAGCCCCTTTAG            | 389~400      | AAGCATCCTGTG | 219~230      |         |
| Score threshold                       |                                         | 60%                                     |                      |                         |              |              |              |         |
| <i>Th</i><br>(M:-2505)<br>(R: -2461)  |                                         | Conservation Cutoffs                    | 80%                  | ACACAGACAAAG            | 230~241      | ACACAGACAAAG | 211~222      |         |
|                                       |                                         |                                         |                      | AAAGCAATATTT            | 320~331      | AAAGCAATATTT | 300~311      |         |
|                                       |                                         |                                         |                      | CAATATTTGTGT            | 324~335      | CAATATTTGTGT | 304~315      |         |
|                                       |                                         | Window size                             | 50                   | AAATCCACATTC            | 362~373      | AAATCCACACTC | 342~353      |         |
|                                       |                                         |                                         |                      | GAGCAGGCAGTG            | 826~837      | GAGCAGGCAGTG | 783~794      |         |
|                                       |                                         |                                         |                      | GAGTAAATAGTC            | 840~851      | GAGTAAATAGTC | 797~808      |         |
|                                       |                                         | Score threshold                         | 85%                  | GAGTAGATAGTA            | 2000~2011    | GAATAGATAGTA | 1964~1975    |         |
|                                       |                                         |                                         |                      | CTAGATTTATTT            | 2094~2105    | CTAGATTTGTCT | 2063~2074    |         |
| AATCCAGCATGG                          |                                         | 2151~2162                               | AATCCAGCATGG         | 2109~2120               |              |              |              |         |
| <i>Dat</i><br>(M:-2775)<br>(R: -2556) |                                         | Conservation Cutoffs                    | 80%                  | GAATAAATGTTT            | 1357~1368    | GAATAAATGTTT | 1017~1028    |         |
|                                       |                                         |                                         |                      | AAATGTTTGTTG            | 1361~1372    | AAATGTTTGCTG | 1021~1032    |         |
|                                       |                                         | Window size                             | 50                   |                         |              |              |              |         |
| Score threshold                       |                                         | 85%                                     |                      |                         |              |              |              |         |
